# Supplementary material for: Amplified chiroptic response in a multi-helical penta-perylene structure
Source: Royal Society of Chemistry journal article supplement (doi:10.1039/d6sc03791g), 2026-06-17
Supplement: d6sc03791g1.pdf [file d6sc03791g1.pdf]

# Supporting Information

## Contents

|                                                          |    |
|----------------------------------------------------------|----|
| S1 General Experimental Information .....                | 2  |
| S2 Figures and Schemes Referenced in the Manuscript..... | 3  |
| S3 Synthetic Procedures and Characterization Data .....  | 6  |
| S4 $^1\text{H}$ - and $^{13}\text{C}$ -NMR Spectra.....  | 12 |
| S5 High-Resolution Mass Spectrometry Data.....           | 17 |
| S6 References .....                                      | 19 |

## S1 General Experimental Information

**Synthesis:** All reactions were conducted in the designated oven-dried glassware. Schlenk flasks were evacuated and backfilled with argon or nitrogen three times prior to use. Anhydrous THF was obtained from a Glass Contour solvent system consisting of a Schlenk manifold with purification columns packed with activated alumina and supported copper catalyst. These solvents were dispensed from Pure-Pac™ containers purchased from Sigma-Aldrich. Anhydrous, Sure/Seal™ 1,4- dioxane was used as purchased from Sigma-Aldrich. Perylene-3,4,9,10- tetracarboxylic diimide, 1-bromoperylene-3,4,9,10-tetracarboxylicdiimide, and 1,6-dibromoperylene-3,4,9,10-tetracarboxylicdiimide were prepared using a procedure developed by Rajasingh et al.<sup>[30]</sup>, Potassium carbonate, potassium acetate, and potassium phosphate were purchased from Sigma-Aldrich, ground to a fine powder using a mortar and pestle, evacuated at 200 °C for 3 h, and stored in a 200 °C oven. All remaining reagents were purchased from Sigma-Aldrich and used without additional purification, unless noted otherwise. SATCO Hi-Pro Spiral 40 W Natural Light or 55 W Bright White (2600 and 3700 lumens, respectively) compact fluorescent lamps (CFLs) were used during the oxidative photocyclizations

**Purification:** Automated chromatography was performed using a Teledyne Isco Combiflash® Rf200 and RediSep® normal-phase silica flash columns. Optima™ hexanes, dichloromethane, and ethyl acetate from Fisher Scientific were used as eluents. Silica plugs consisted of Silicycle SiliaFlash® P60 40-63 μm silica gel. Analytical TLC plates were cut from Silicycle SiliaPlate™ Glass Backed TLC Extra Hard Layer silica gel plates, 60 Å, 20 × 20 cm, 250 μm thickness, F-254 indicator.

**Electronic Circular Dichroism:** The ECD spectra were recorded using a Jasco J-810 spectropolarimeter. A 10 mm pathlength high precision cell made of Quartz SUPRASIL® from Hellma Analytics was used in the collection of the spectra.

**NMR Spectroscopy:** <sup>1</sup>H-NMR spectra were recorded on a Bruker 500 MHz spectrometer. <sup>13</sup>C-NMR were recorded on a Bruker 101 or 126 MHz spectrometer with complete proton decoupling. Chemical shifts for protons are reported in parts per million (ppm) downfield from tetramethylsilane (TMS) and were referenced to residual proton in the NMR solvent (CHCl<sub>3</sub>, δ 7.26; C<sub>2</sub>H<sub>2</sub>Cl<sub>4</sub>, δ 6.00. Chemical shifts for carbon are reported in ppm downfield from TMS and were referenced to the carbon resonances of the NMR solvent (CDCl<sub>3</sub>, δ 77.16; C<sub>2</sub>D<sub>2</sub>Cl<sub>4</sub>. <sup>1</sup>H-NMR data are represented as follows: chemical shift, multiplicity (s = singlet, d = doublet, dd = doublet of doublets, m = multiplet, and bm = broad multiplet), coupling constants in Hz, and integration. Most <sup>1</sup>H- and <sup>13</sup>C-NMR spectra were recorded at elevated temperatures (noted in K) to enhance peak resolution, particularly in the aromatic region. Peaks corresponding to the numerous aromatic carbon atoms in the reported compounds often overlap, thereby reducing the number of observed peaks.

**High-Resolution Mass Spectrometry (HRMS):** HRMS was conducted using a Waters XEVO G2XS instrument equipped with a UPC2 SFC inlet, electrospray (ESI) and atmospheric pressure chemical (APCI) ionization, and a QToF mass spectrometer. For large compounds, HRMS was performed using a Bruker ultrafleXtreme

MALDI-TOF/TOF with a frequency-tripled Nd:YAG laser (355 nm), linear and reflector modes, and Precursor Ion Selector and LIFT technologies for MS/MS analysis.

**Quantum Mechanical Calculations:** All quantum chemical calculations were performed using Jaguar, version 8.3, Schrodinger, Inc., New York, NY, 2014.9 All geometries were optimized using the B3LYP functional and the 6-31G\*\* basis set. We calculated the absorption spectrum of the optimized geometries using the TD-DFT method that is included in the Jaguar package. We used the 6-31G\*\* basis set in these calculations.

**Voltammetry:** Cyclic voltammograms in Figure 4 were recorded on a CHI600C electrochemical workstation using Ag/AgCl as the reference electrode, glassy carbon (3 mm diameter) as the working electrode, and a platinum wire as the counter electrode. Experiments were performed under argon in dichloromethane with [Bu<sub>4</sub>N][PF<sub>6</sub>] as the supporting electrolyte at a scan rate of 0.05 V/

## S2 Figures and Schemes Referenced in the Manuscript

### Reactions and MALDI-TOF spectra associated with table 1:

**Figure S1:** Reaction conditions and MALDI-TOF spectra associated with Table 1, Entry 1 and 2

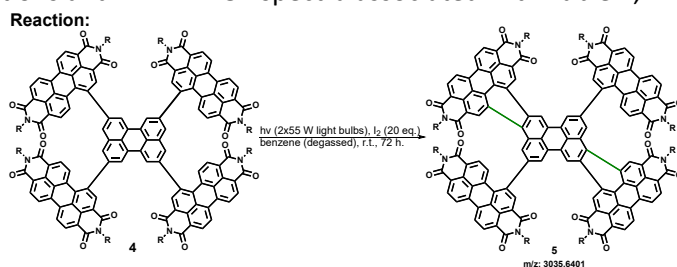

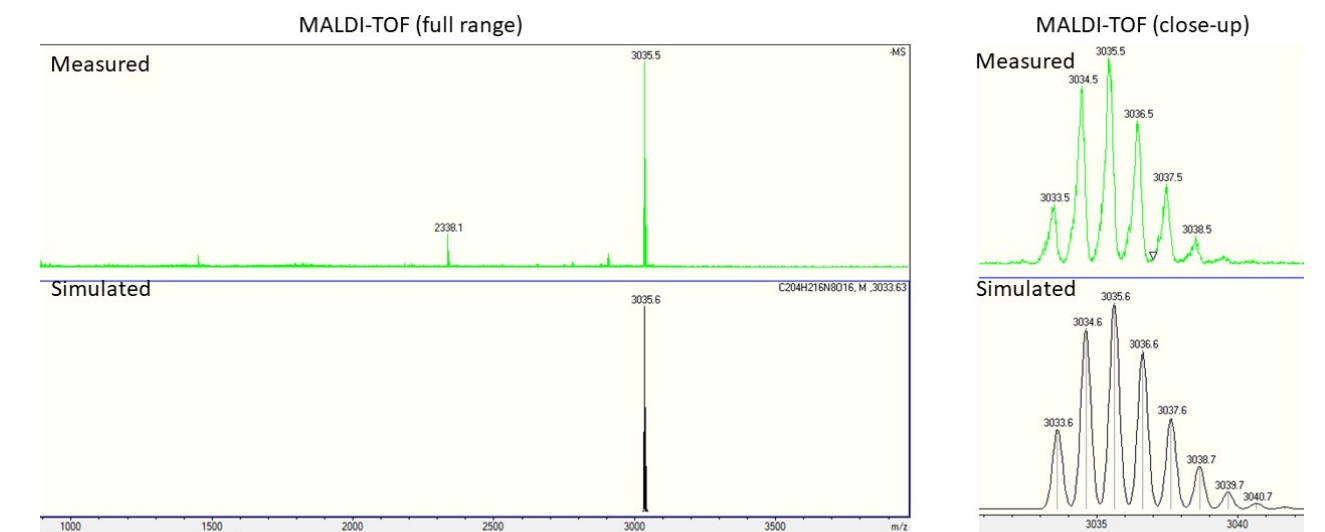

**Figure S2:** Reaction conditions and MALDI-TOF spectra associated with Table 1, Entry 3:

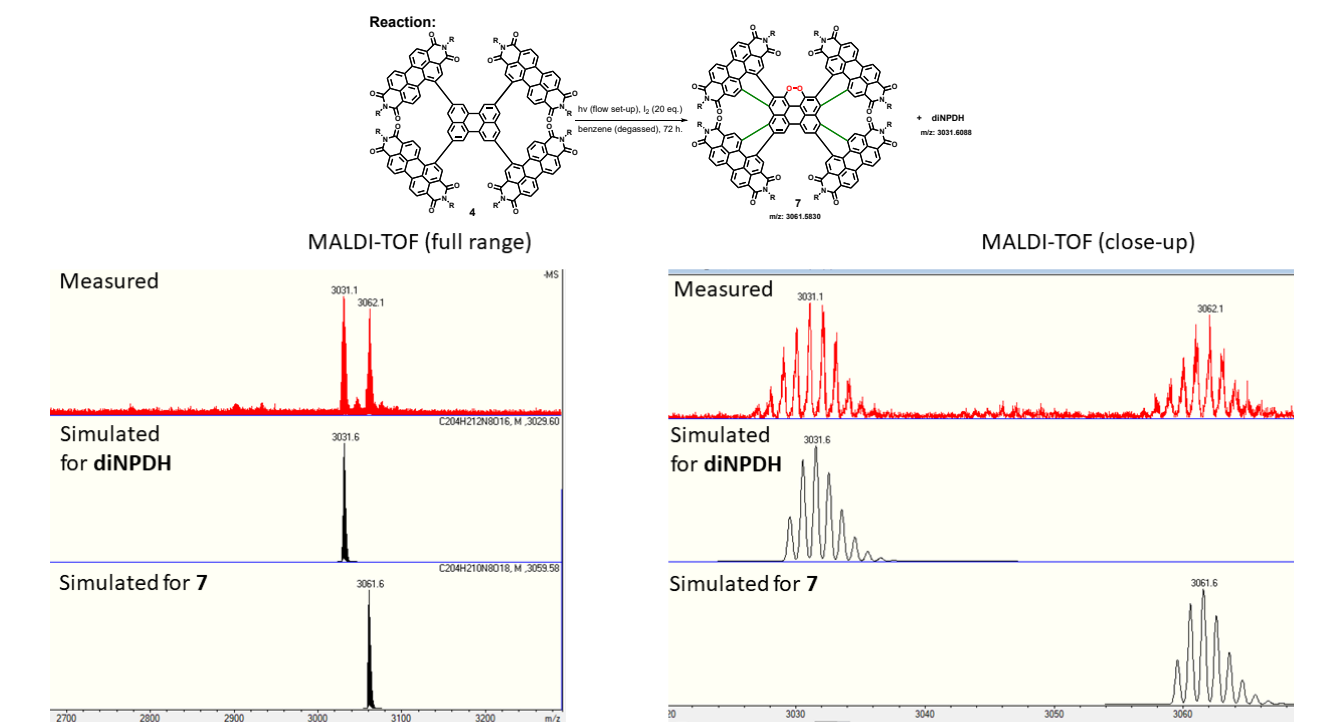

**Figure S3:** Reaction conditions and MALDI-TOF spectra associated with Table 1, Entry 4:

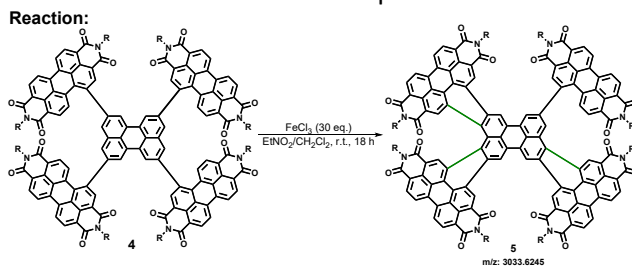

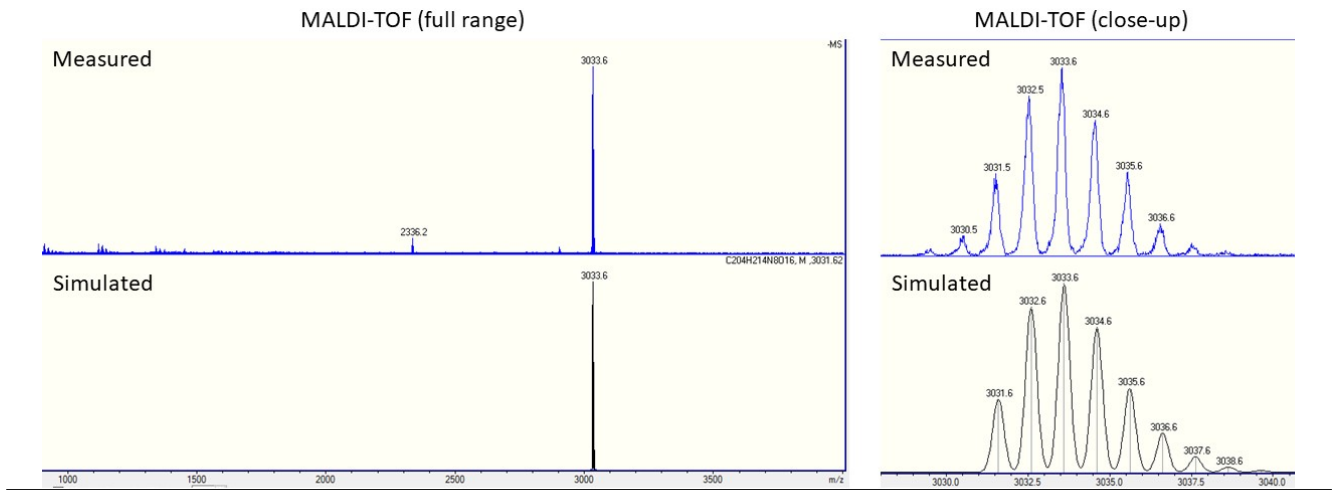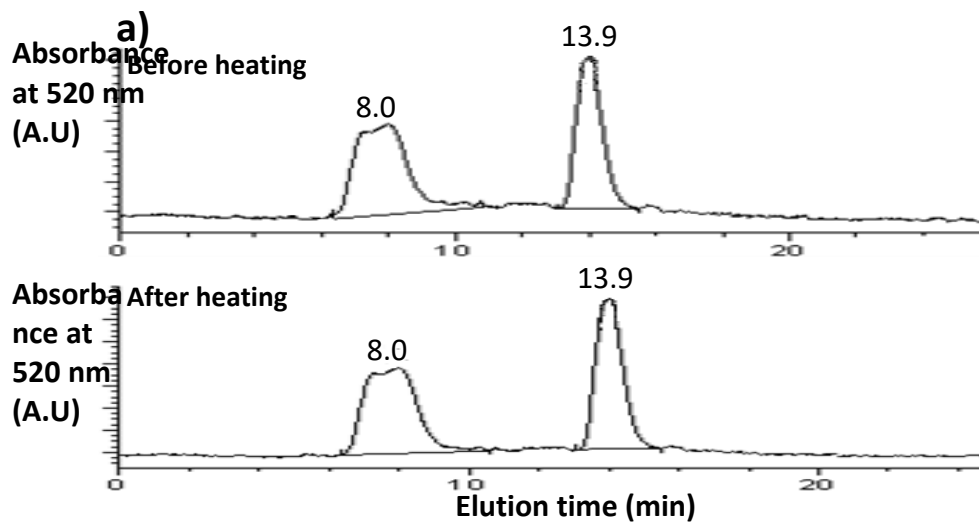

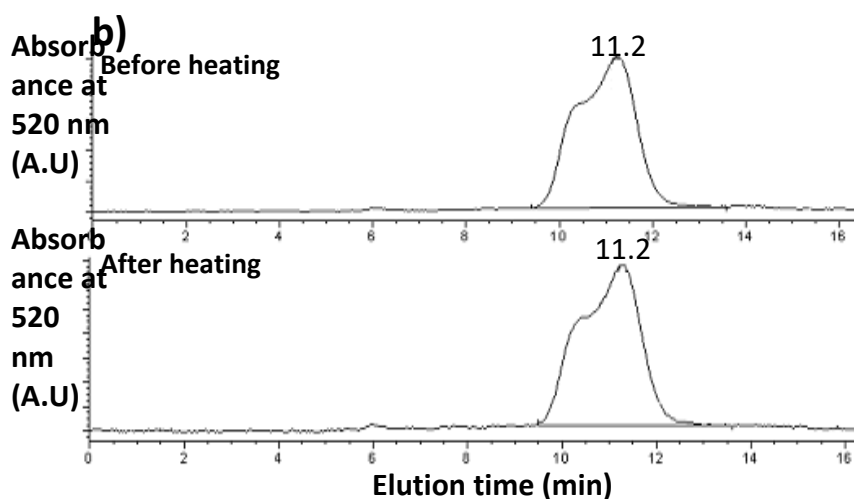

**Figure S4:** Chiral HPLC chromatograms of **chiral-diNPDH (A)** and **meso-diNPDH (B)** before and after heating for 2 hours at 250 °C in diphenylether. The peak broadening observed is attributed to large quantity of diphenylether present in the samples. **The HPLC conditions are described in the caption of Figure S7.**

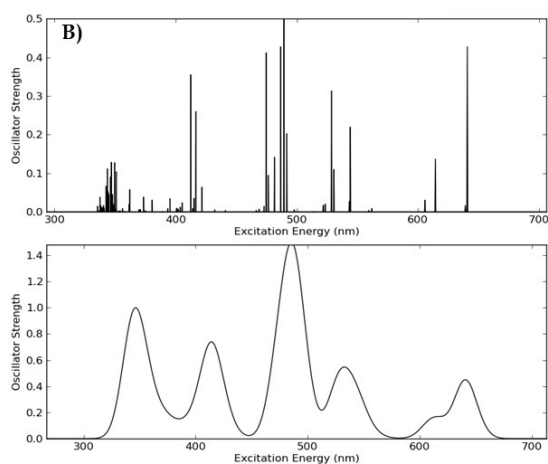

**Figure S5:** *top*) TD-DFT (B3LYP/6-21G\*\*) calculated oscillator strength (40 strongest oscillators) for **chiral-diNPDH**. *bottom*) all oscillators set to 20 nm FWHM.

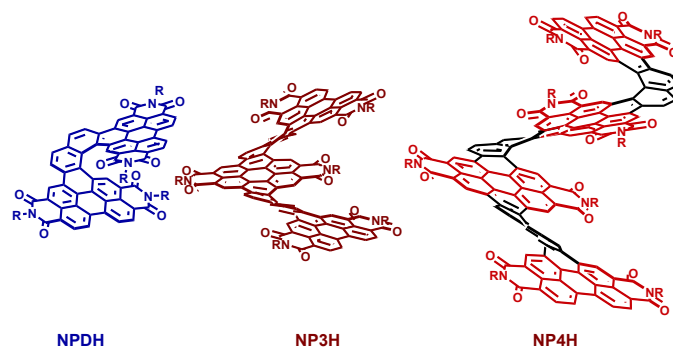

Figure S6: Structure of series of PDI-helicenes.

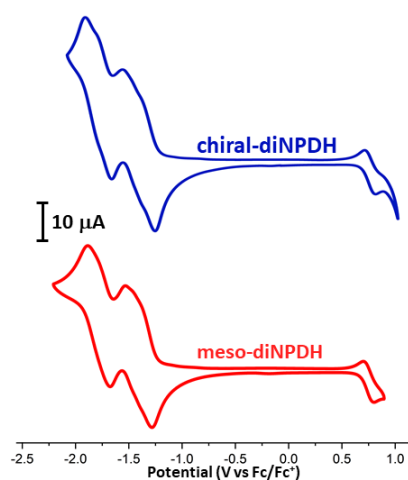

Figure S7: Cyclic voltammograms of meso-diNPDH and chiral-diNPDH (~1 mM, 50 mV s<sup>-1</sup> scan rate) in argon sparged dichloromethane with 0.1 M [Bu<sub>4</sub>N][PF<sub>6</sub>] as the supporting electrolyte.

### S3 Synthetic Procedures and Characterization Data

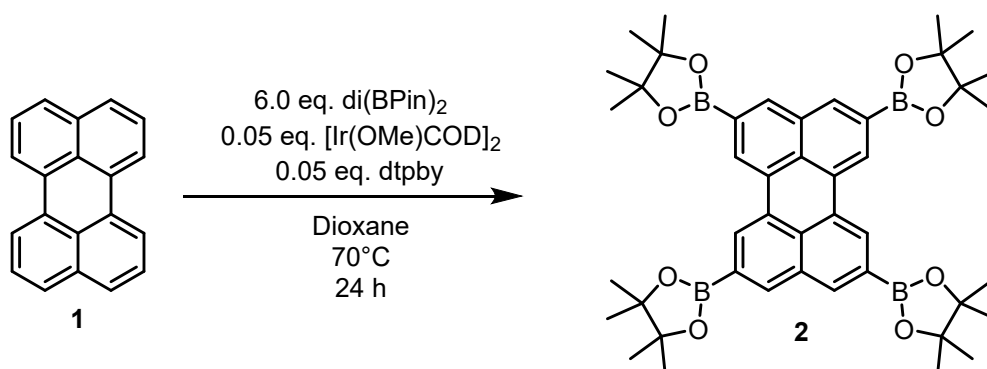

**Procedure:** To a flame dried Schlenk flask, fitted with a magnetic stir bar, [Ir(OMe)COD]<sub>2</sub> (0.131 g, 0.198 mmol, 0.05 eq.), 4,4'-di-*tert*-butyl-2,2'-bipyridine (0.053 g, 0.198 mmol, 0.05 eq.), Bis(pinacolato)diboron (6.04 g, 23.8 mmol, 6.0 eq.) and perylene (**1**) (1.00 g, 3.96 mmol, 1.00 eq.) was added. The Schlenk flask

was sealed with a rubber septum, and cycled between a nitrogen atmosphere and vacuum three times. To the nitrogen filled flask was added degassed anhydrous dioxane (79 mL). The reaction mixture was heated at 80 °C for 24 hours. The contents of the Schlenk flask was transferred to a round bottomed flask, and all volatiles were removed under reduced pressure. Acetone (50 mL) was added to the round bottomed flask, and the solids were suspended by sonication for 5 minutes. The suspension is filtered through a glass sintered funnel, and the solids washed with room tempered acetone (200 mL), leaving **2** as a yellow solid.

The protocol is a modification of a previously reported literature protocol.<sup>[31]</sup>

**Yield:** 2.88 g, 3.81 mmol, 96%

**<sup>1</sup>H NMR:** (500 MHz, CDCl<sub>3</sub>, 300K) δ 8.62 (s, 4H), 8.25 (s, 4H), 1.43 (s, 48H)

**<sup>13</sup>C NMR:** (126 MHz, CDCl<sub>3</sub>) δ 137.1, 133.4, 132.1, 130.5, 126.2, 126.7, 84.2, 25.0

**HR-MS:** (M+H<sup>+</sup>) calculated for C<sub>44</sub>H<sub>57</sub>B<sub>4</sub>O<sub>8</sub> = 757.4453 m/z; found 757.4456

All data in accordance with what has previously been reported.<sup>[31]</sup>

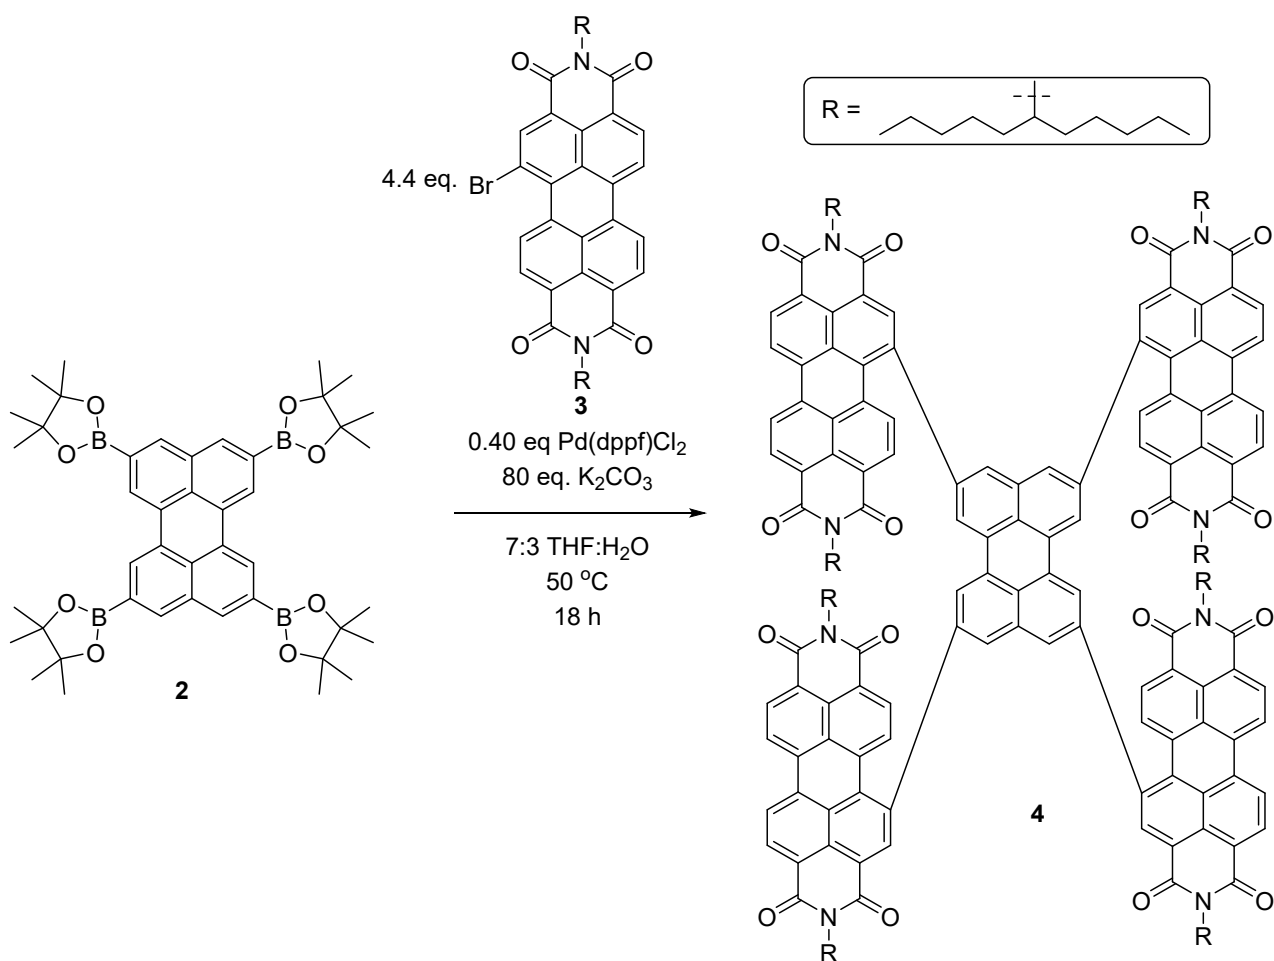



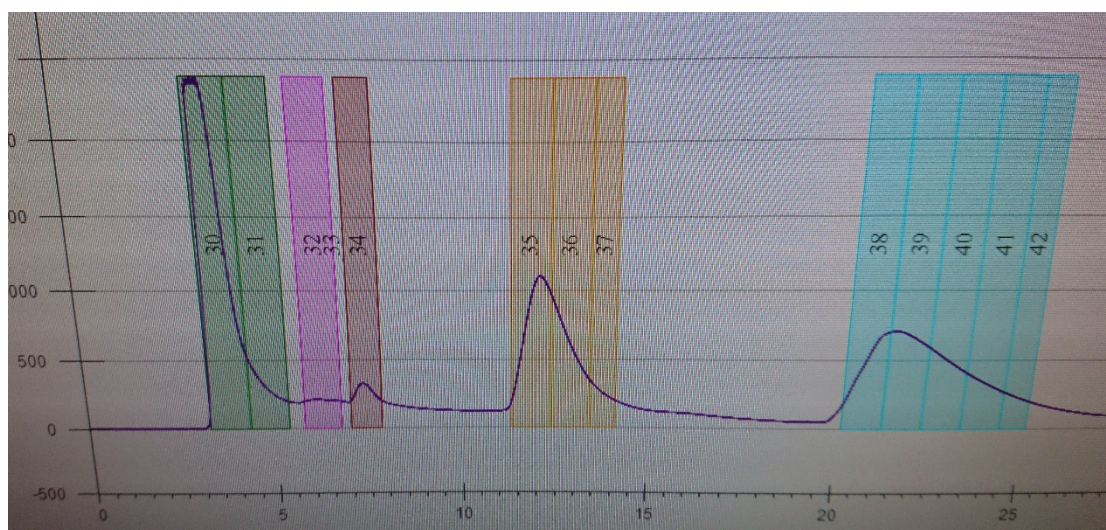

**Figure S8:** Chromatogram of the preparative HPLC run for the separation of the diastereomers of diNPDH. Meso-diNPDH elutes as the blue fraction. Interestingly both the green and yellow marked areas of the chromatogram corresponds to chiral diNPDH. The fact that it elutes as two separate fractions is attributed to the formation of aggregates at high concentration. Aggregates has also been observed by  $^1\text{H-NMR}$  in saturated solutions of  $\text{CDCl}_3$ ,  $\text{C}_2\text{D}_2\text{Cl}_4$  and benzene- $\text{d}_6$ .

**Chiral HPLC:** The sample is dissolved in 50 % toluene in hexanes and injected onto a CHIRALPAK® IA3 column. The eluent system used was a linear gradient of 50 to 75 % toluene in hexanes over 20 minutes with a flow rate of 1.0 mL/min. Chromatograms are shown below (Figure S9).

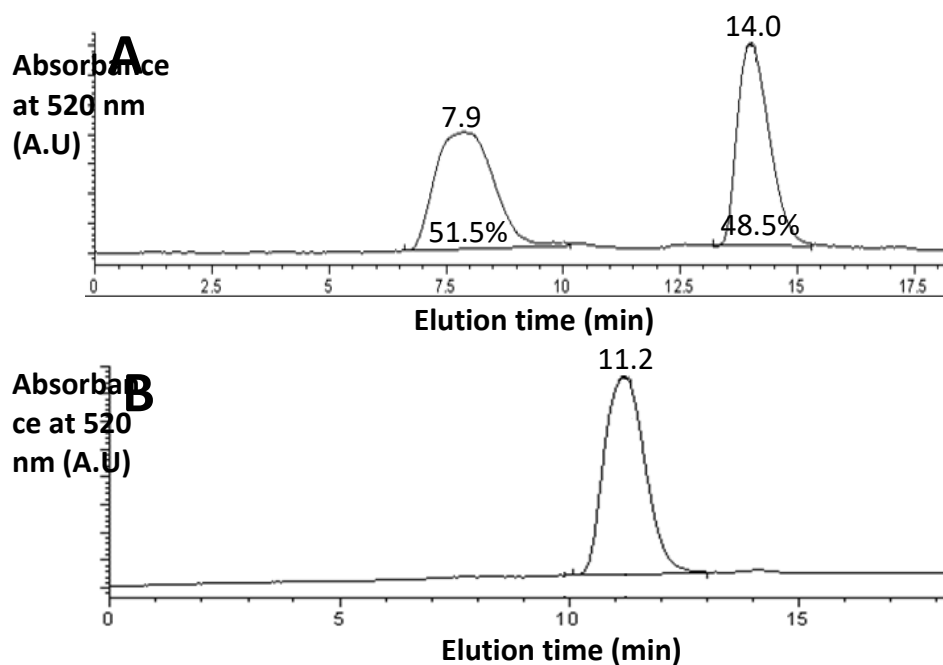

**Figure S9:** A) Chromatogram of Chiral-diNPDH. B) Chromatogram of meso-diNPDH. Identical HPLC conditions are used for both samples.

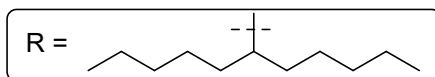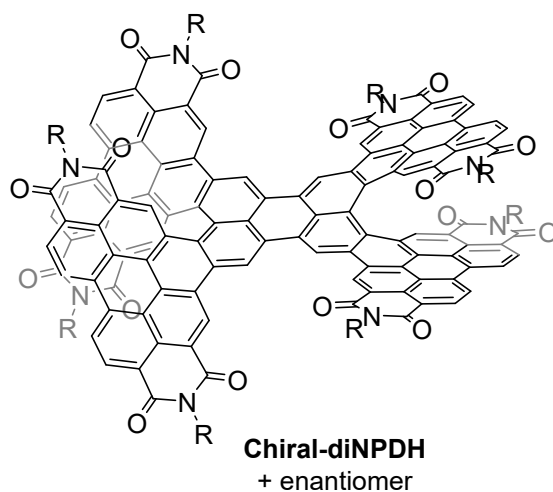

**<sup>1</sup>H-NMR:** (500 MHz, C<sub>2</sub>Cl<sub>4</sub>D<sub>2</sub>, 370 K):  $\delta$  10.96 (s, 4H), 10.93 (s, 4H), 9.41 (d,  $J$  = 8.05 Hz, 4H), 9.33-9.27 (m, 8H), 8.94 (d,  $J$  = 7.78 Hz, 4H), 5.58-5.50 (m, 4H), 4.60-4.48 (m, 4H), 2.70-2.48 (m, 8H), 2.25-2.10 (m, 8H), 1.70-0.74 (m, 160 H).

**<sup>13</sup>C NMR** (126 MHz, Toluene-*d*<sub>8</sub>)  $\delta$  164.4, 164.1, 163.4, 162.8, 137.3, 136.9, 136.8, 133.9, 133.7, 132.5, 130.0, 129.8, 129.3, 128.7, 128.7, 127.7, 126.9, 126.6, 126.2, 125.8, 125.0, 125.0, 124.9, 124.2, 123.6, 123.1, 123.1, 122.4, 121.4, 120.2, 55.3, 53.9, 33.2, 33.0, 32.9, 32.1, 32.1, 31.8, 31.6, 31.3, 31.3, 29.7, 29.6, 29.3, 27.2, 26.1, 26.0, 22.7, 22.7, 22.5, 22.4, 22.1.

**HR-MS** (MALDI-TOF): calculated for [C<sub>204</sub>H<sub>212</sub>N<sub>8</sub>O<sub>16</sub>]<sup>+</sup> is 3031.6082 m/z, found 3031.5944.

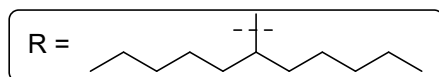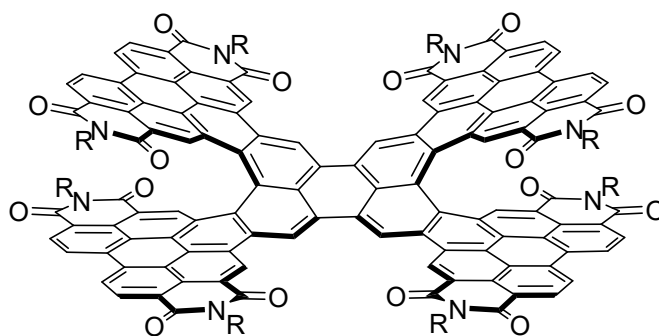

**meso-diNPDH**

**<sup>1</sup>H NMR** (500 MHz, C<sub>2</sub>Cl<sub>4</sub>D<sub>2</sub>, 370K) δ 11.10 (s, 8H), 9.38 (d, *J* = 7.86, 4H), 9.29 (d, *J* = 7.86, 4H), 9.26 (d, *J* = 7.81, 4H), 8.91 (d, *J* = 7.81, 4H), 8.81 (s, 4H), 5.66-5.56 (m, 4H), 4.68-4.45 (m, 4H), 2.76-2.59 (m, 8H), 2.38-2.19 (m, 8H), 1.89-0.74 (m, 160 H).

**<sup>13</sup>C NMR** (126 MHz, C<sub>2</sub>Cl<sub>4</sub>D<sub>2</sub>, 370K) δ 163.7, 162.8, 134.0, 133.9, 132.8, 130.7, 130.4, 129.7, 128.6, 128.4, 128.3, 128.2, 127.1, 126.5, 126.3, 126.2, 125.9, 125.0, 124.6, 123.5, 123.4, 122.3, 121.1, 120.3, 74.3, 74.1, 73.8, 55.7, 54.3, 33.0, 32.1, 32.0, 31.9, 31.6, 29.7, 29.3, 27.2, 27.1, 26.4, 26.2, 22.7, 22.7, 22.5, 22.3, 14.1, 14.0, 14.0.

Due to overlap of the resonances only 47 carbons out of the expected 52 are observed.

**HR-MS** (MALDI-TOF): calculated for [C<sub>204</sub>H<sub>212</sub>N<sub>8</sub>O<sub>16</sub>]<sup>+</sup> is 3031.6082 m/z, found 3031.5787.

# S4 1H- and 13C-NMR Spectra

## 1H-NMR of 2 (CDCl3, 300K)

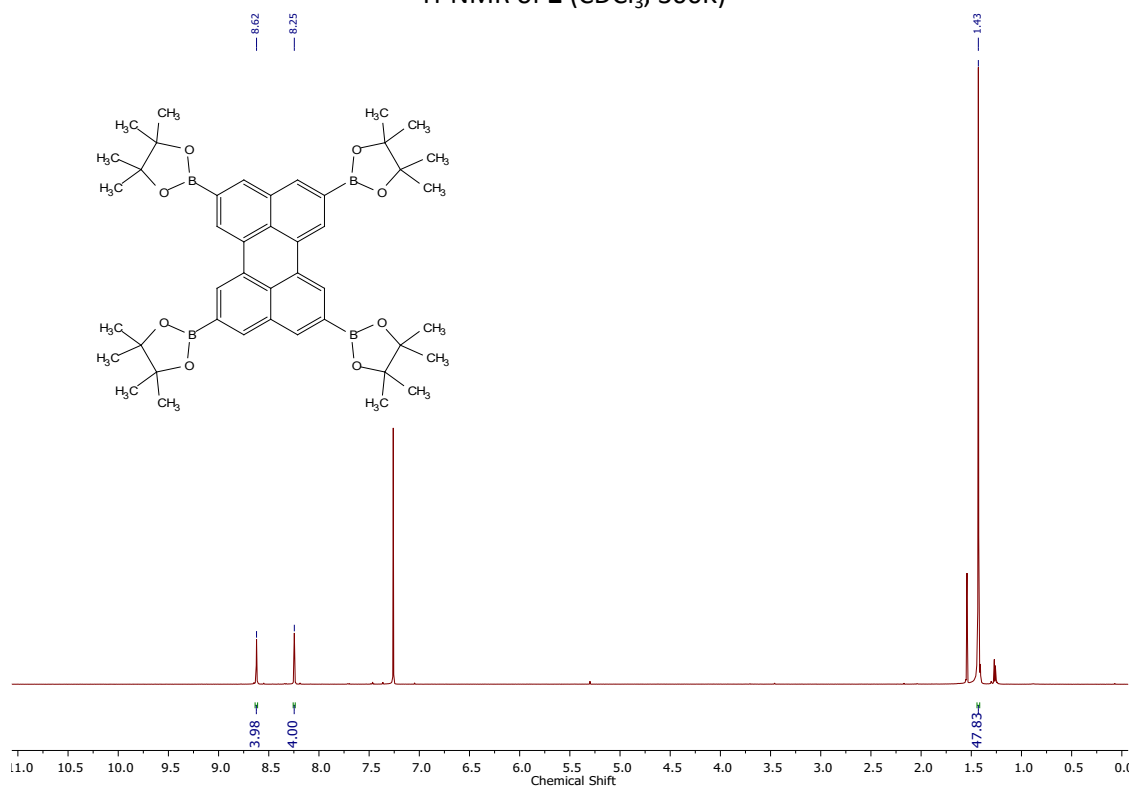

## 13C-NMR of 2 (CDCl3, 300 K)

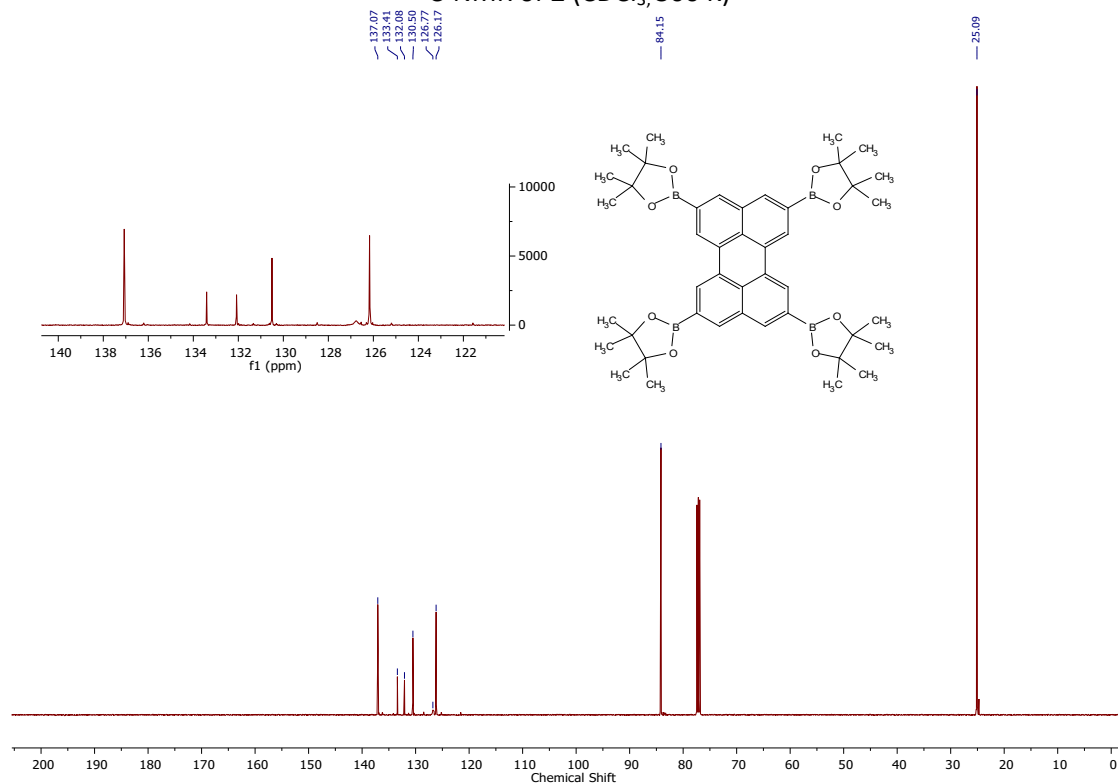

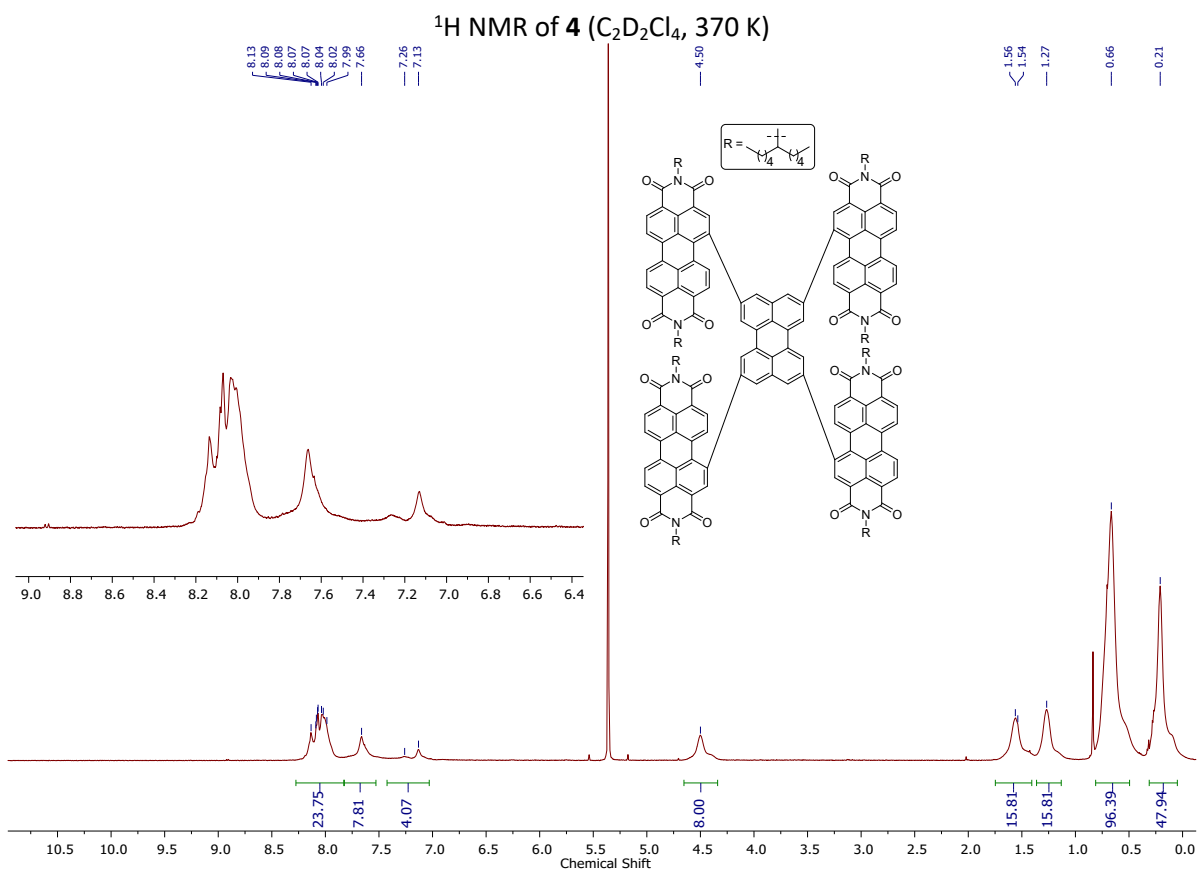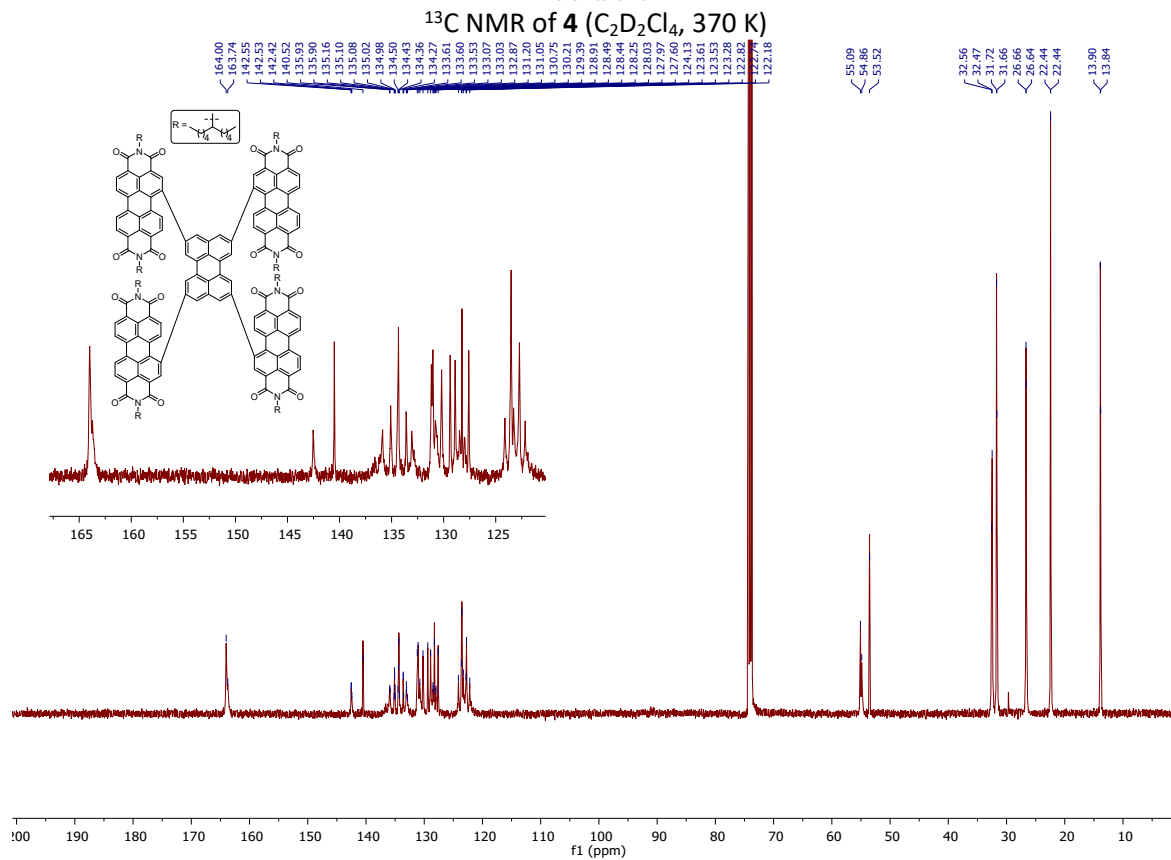

**$^1\text{H}$  NMR of chiral-diNPDH ( $\text{C}_2\text{D}_2\text{Cl}_4$ , 370 K)**

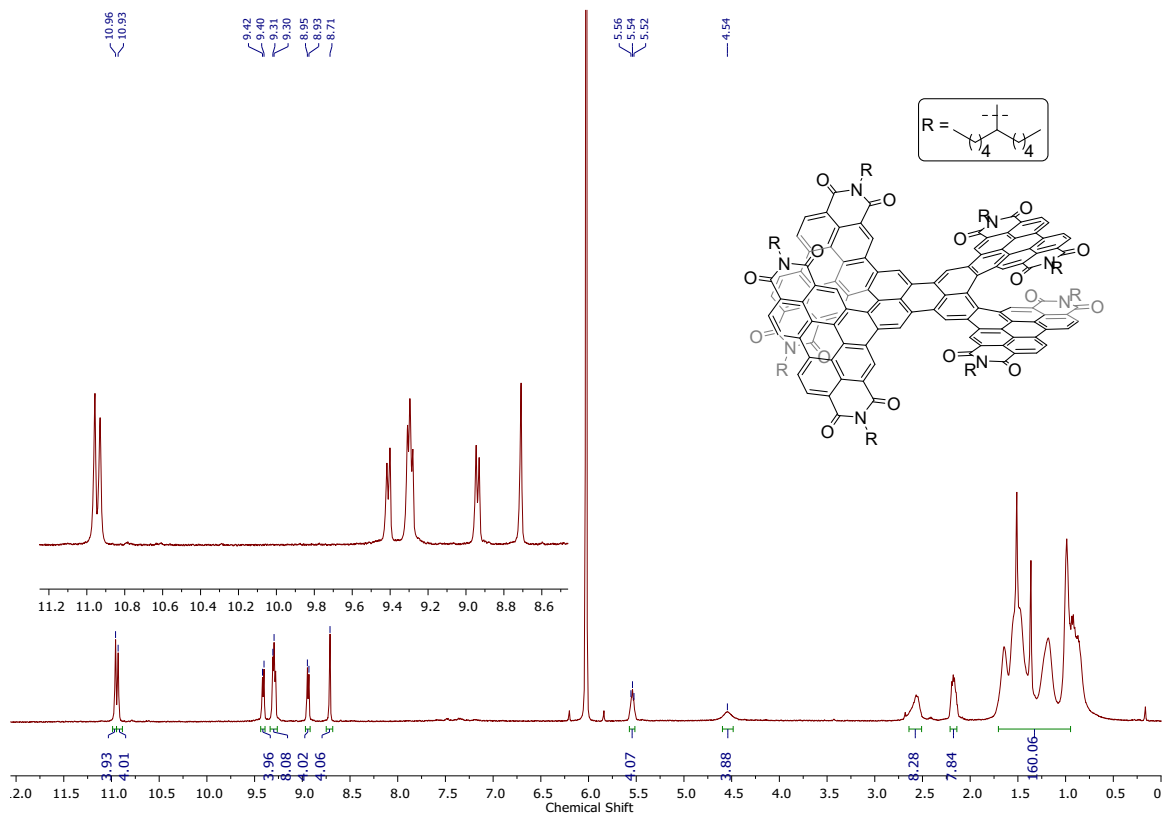

$^1\text{H}$ - $^1\text{H}$  COSY of chiral-diNPDH ( $\text{C}_2\text{D}_2\text{Cl}_4$ , 370 K). The relevant COSY signals are highlighted in the insert.

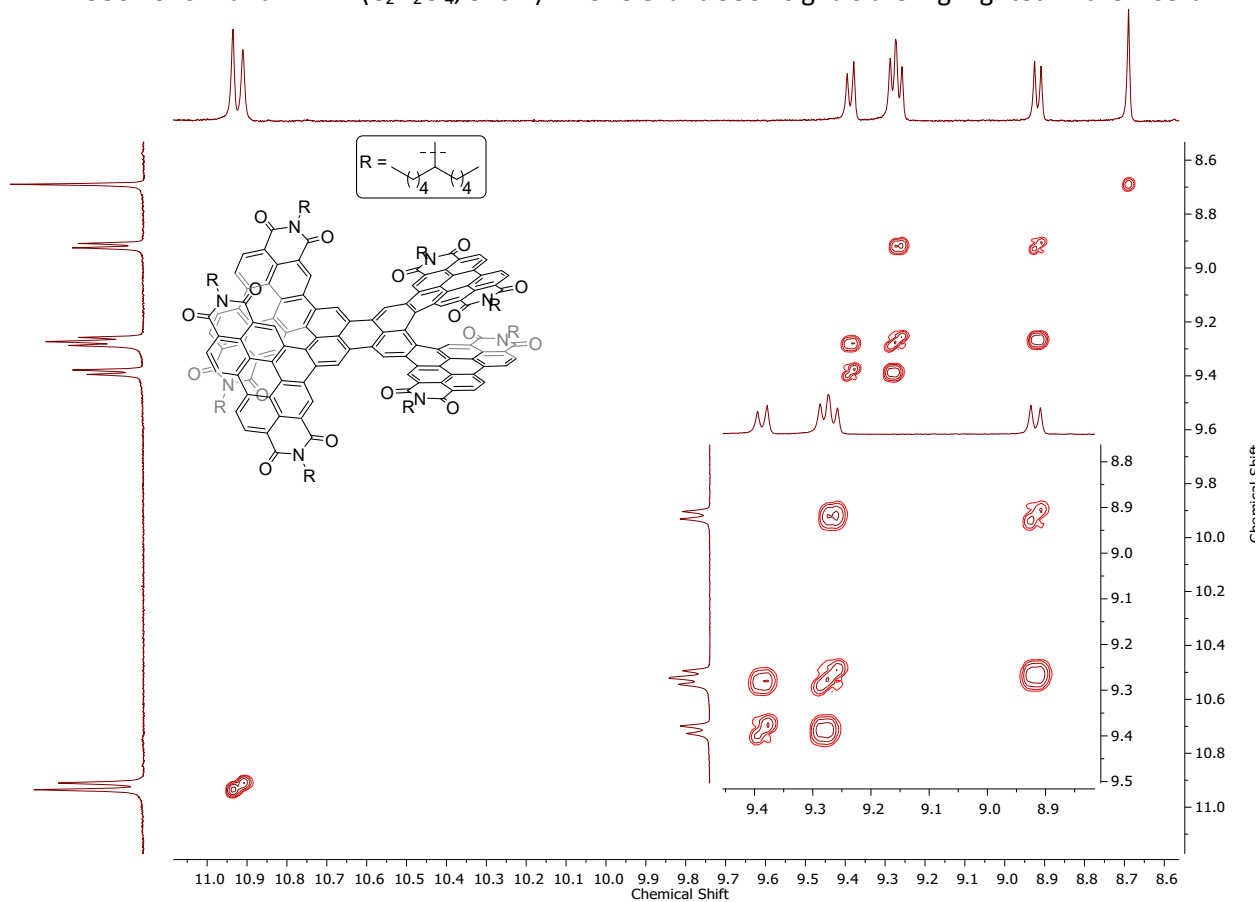

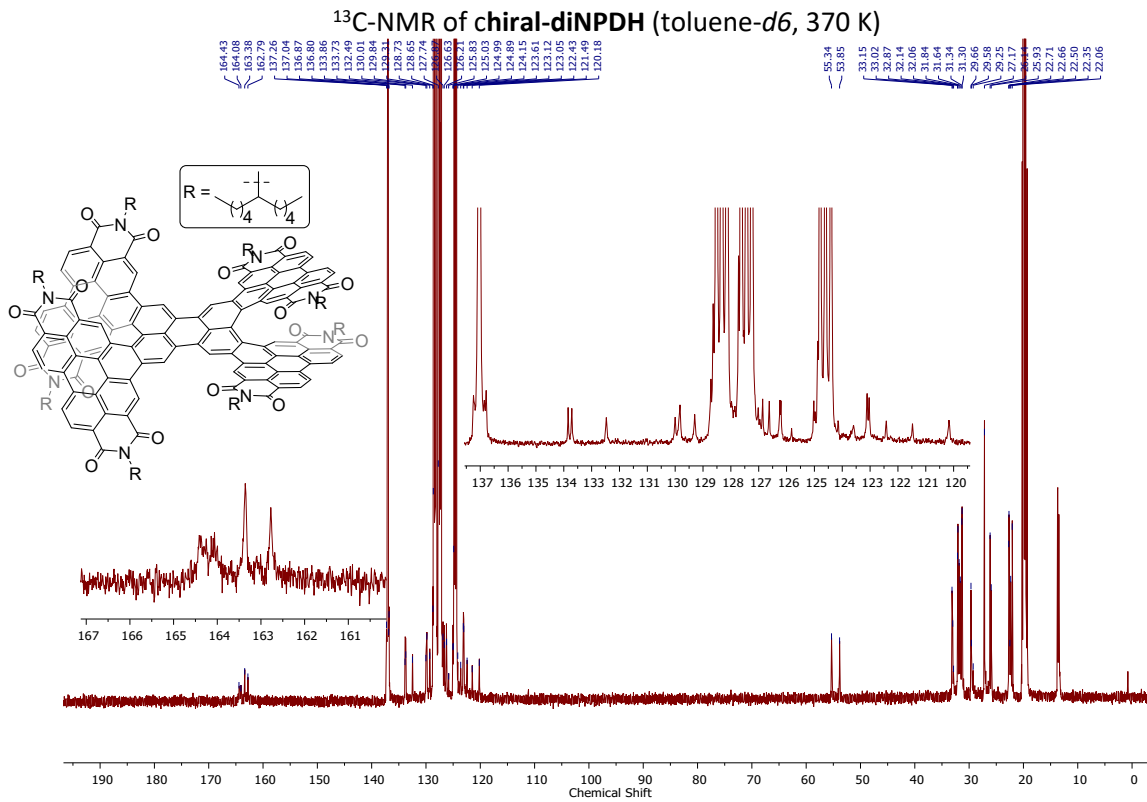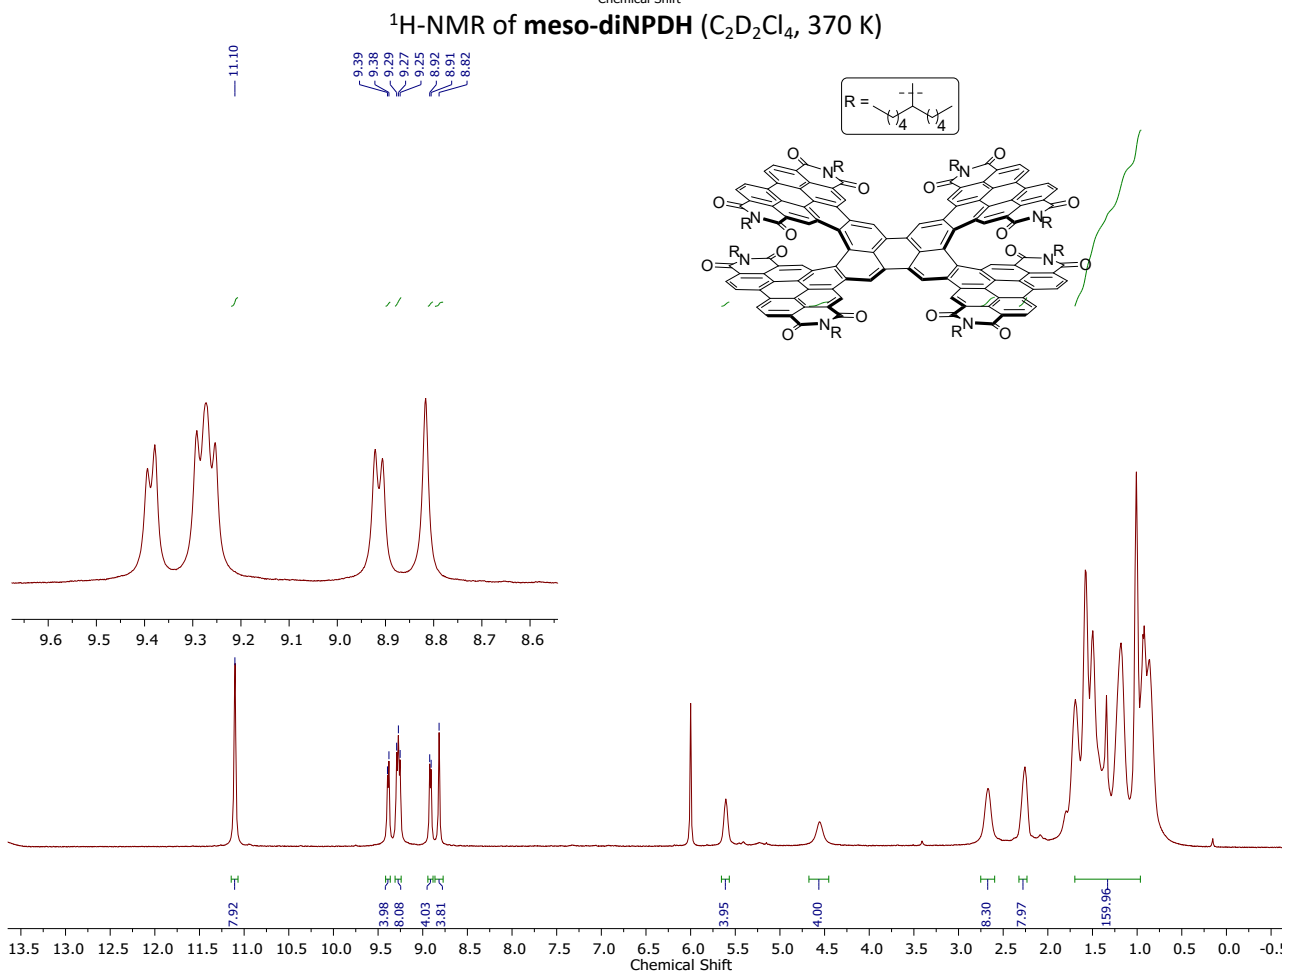

$^1\text{H}$ - $^1\text{H}$  COSY of *meso*-diNPDH ( $\text{C}_2\text{D}_2\text{Cl}_4$ , 370 K). The relevant COSY signals are highlighted in the insert.

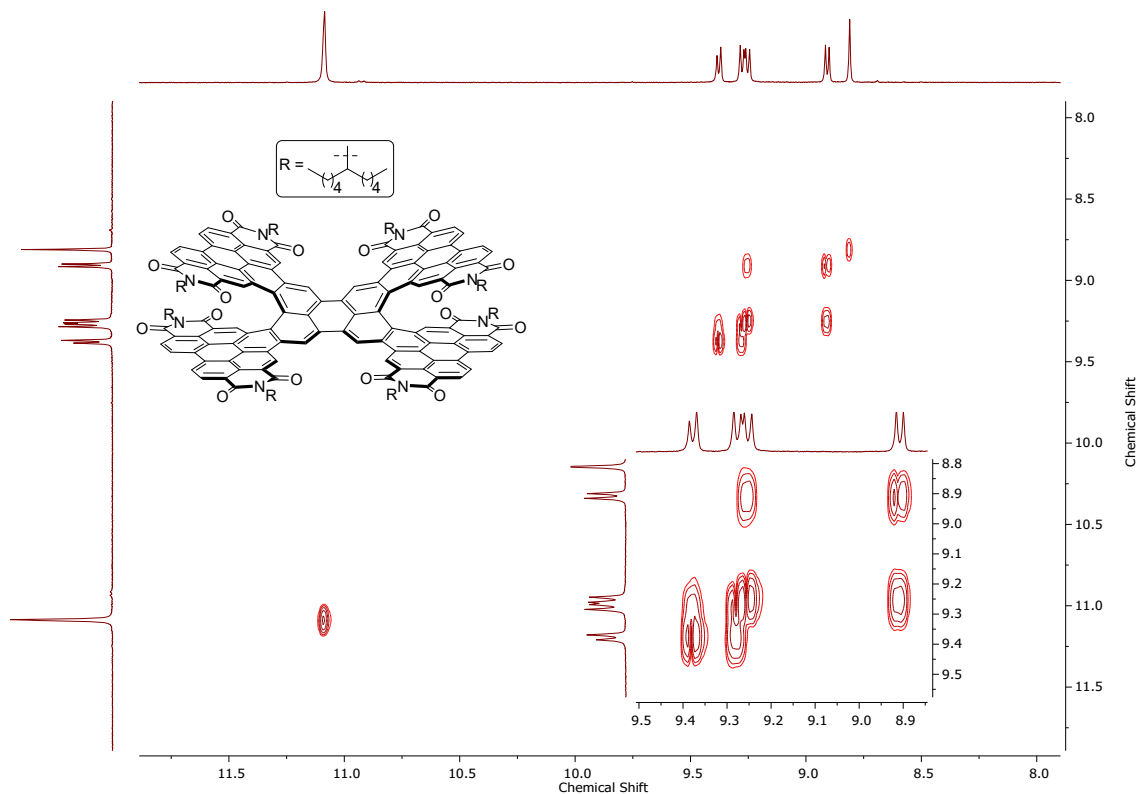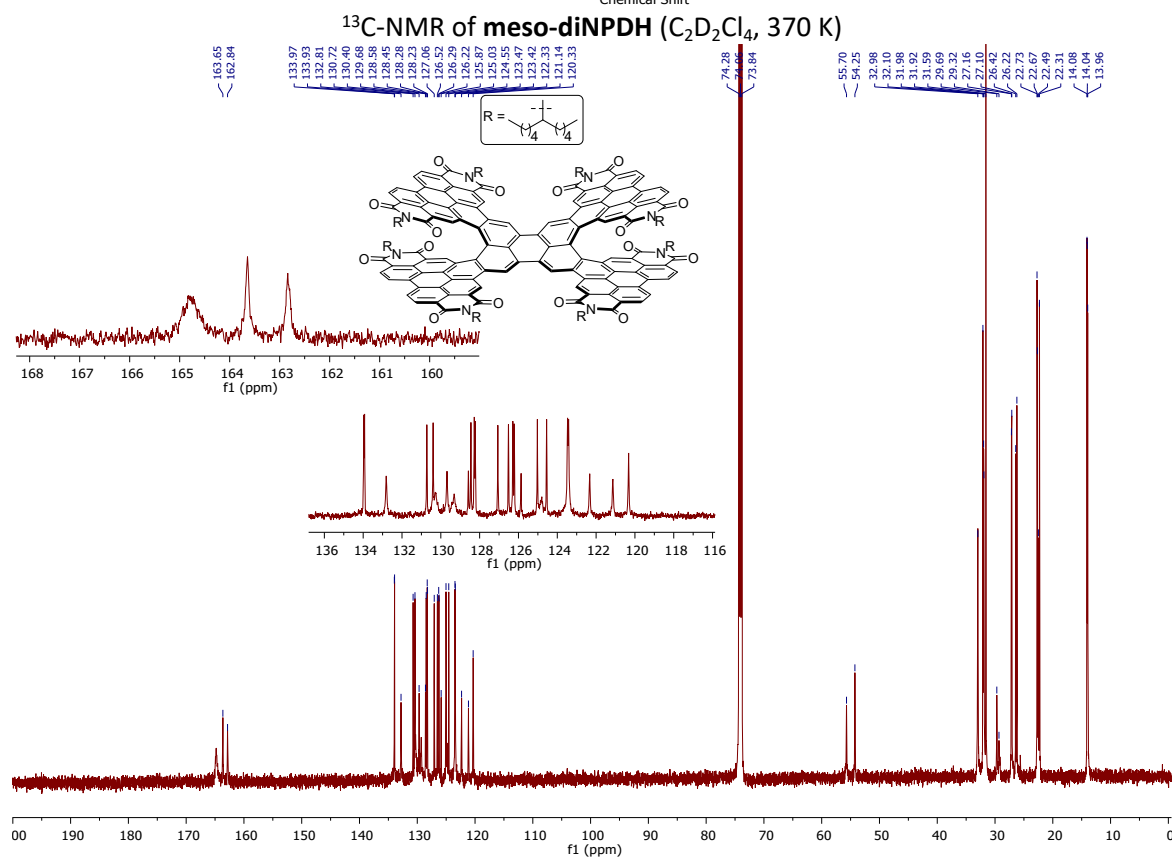

# S5 High-Resolution Mass Spectrometry Data

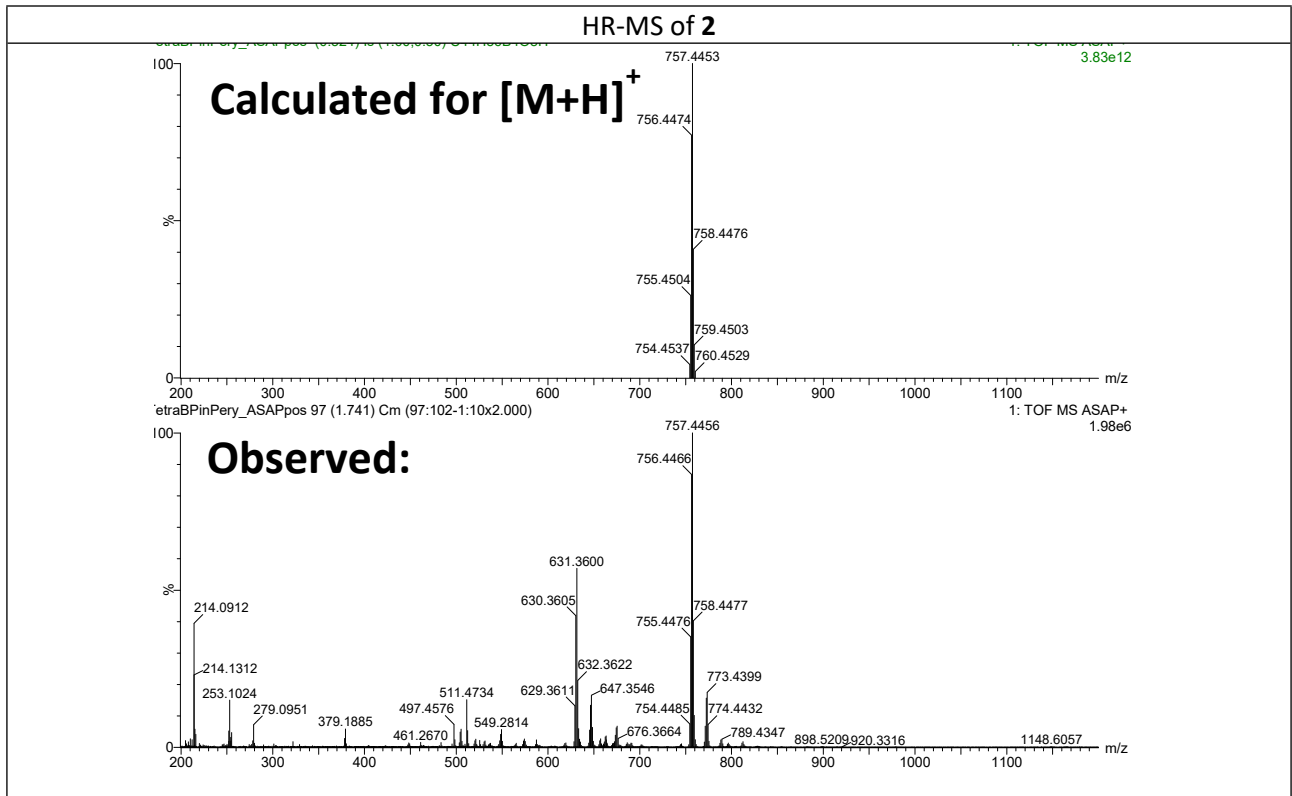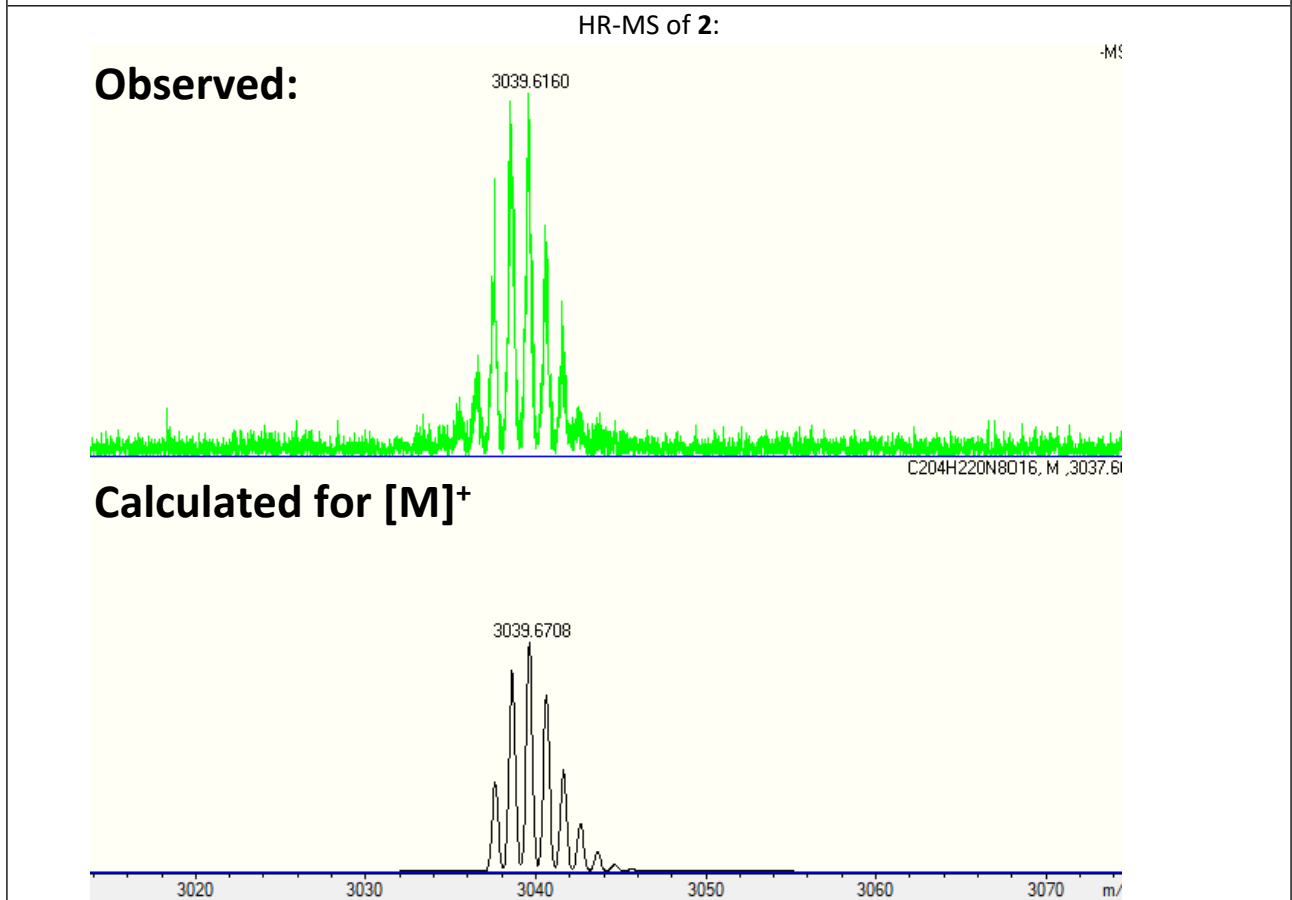

HR-MS of chiral-diNPDH:

Observed:

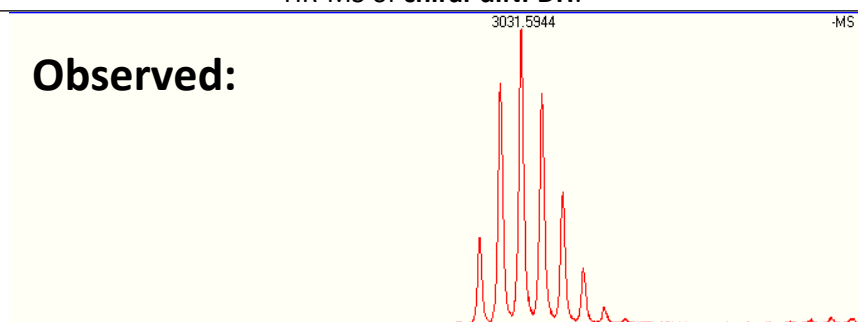

Calculated for  $[M]^+$

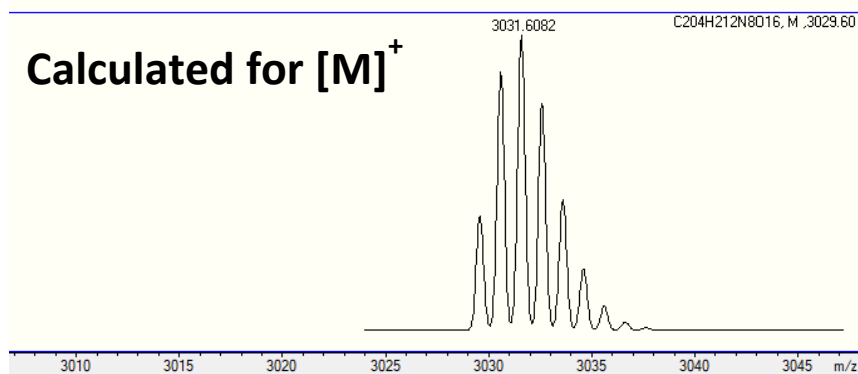

HR-MS of Meso-diNPDH:

Observed:

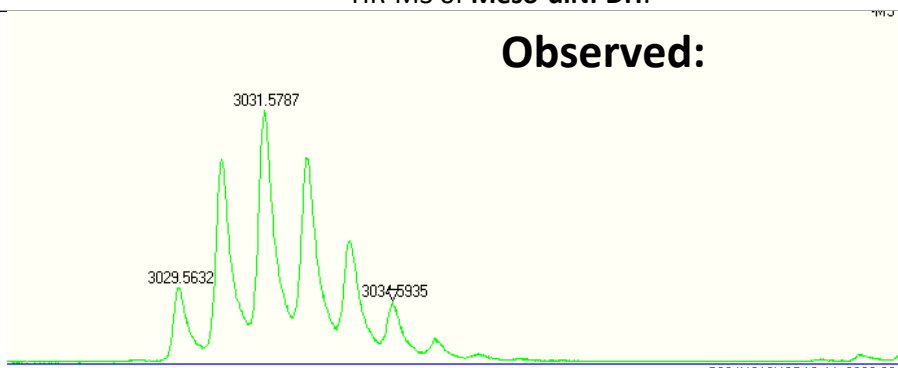

Calculated for  $[M]^+$

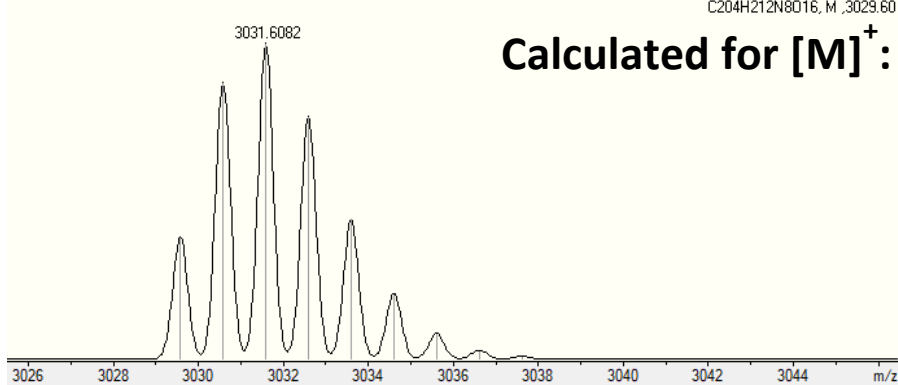

## S6 References

- [30] Rajasingh, P.; Cohen, R.; Shirman, E.; Shimon, L. J. W.; Rybtchinski, B. Selective Bromination of Perylene Diimides under Mild Conditions. *J. Org. Chem.* **2007**, *72* (16), 5973–5979. <https://doi.org/10.1021/jo070367n>.
- [31] Coventry, D. N.; Batsanov, A. S.; Goeta, A. E.; Howard, J. A. K.; Marder, T. B.; Perutz, R. N. Selective Ir-Catalysed Borylation of Polycyclic Aromatic Hydrocarbons: Structures of Naphthalene-2,6-Bis(Boronate), Pyrene-2,7-Bis(Boronate) and Perylene-2,5,8,11-Tetra(Boronate) Esters. *Chem. Commun.* **2005**, No. 16, 2172–2174. <https://doi.org/10.1039/b501778e>.
